# Supplementary material for: Structural requirements for protein-catalyzed annealing of U4 and U6 RNAs during di-snRNP assembly
Source: PubMed Central journal article supplement — Nucleic Acids Res. 2015 Dec 15;44(3):1398–410. doi: 10.1093/nar/gkv1374 (PMC4756825; doi:10.1093/nar/gkv1374), 2015-12-15
Supplement: supp_gkv1374_nar-03150-r-2015-File010.pdf [file supp_gkv1374_nar-03150-r-2015-File010.pdf]

## SUPPLEMENTARY FIGURES

## Supplementary Figure S1.

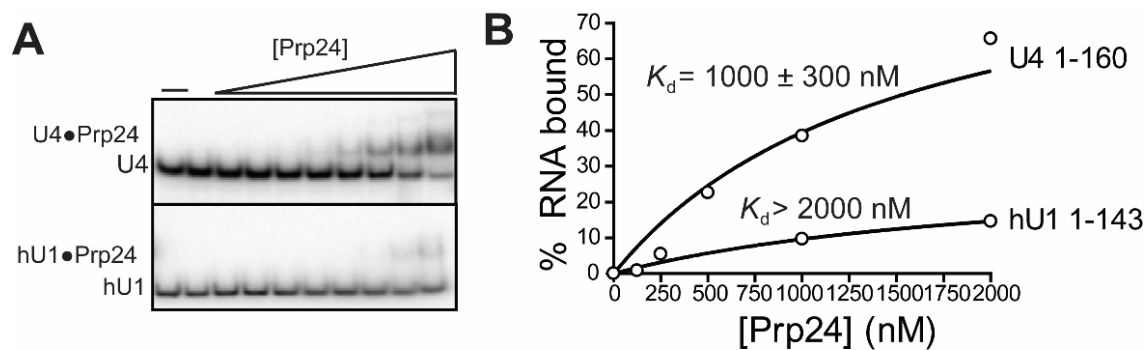

**Supplementary Figure S1.** Prp24 binds U4 with greater affinity than a control RNA of similar length. A) Native gel analysis comparing Prp24 binding to U4 RNA (top) and a non-specific control, human U1 RNA (bottom). B) Quantitation of Prp24 binding to U4 and hU1 RNAs. Prp24 binds U4 with a  $K_d$  of 1000 nM, while the binding of Prp24 to hU1 is significantly weaker and cannot be accurately quantified.

**Supplementary Figure S2.**

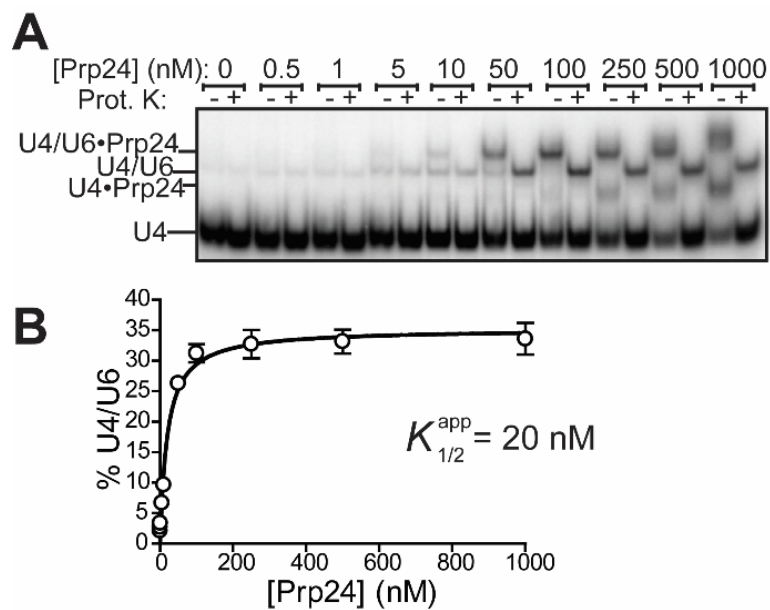

**Supplementary Figure S2.** Effect of Prp24 concentration on the rate of annealing. A) Native gel showing the formation of U4/U6 at a single time point (90 minutes) in the presence of increasing concentrations of full-length Prp24. Samples were divided into intact ribonucleoprotein (minus lanes) and proteinase K-treated (plus lanes) samples. B) Quantification of U4/U6 formation after 90 minutes for varying concentrations of Prp24.

**Supplementary Figure S3.**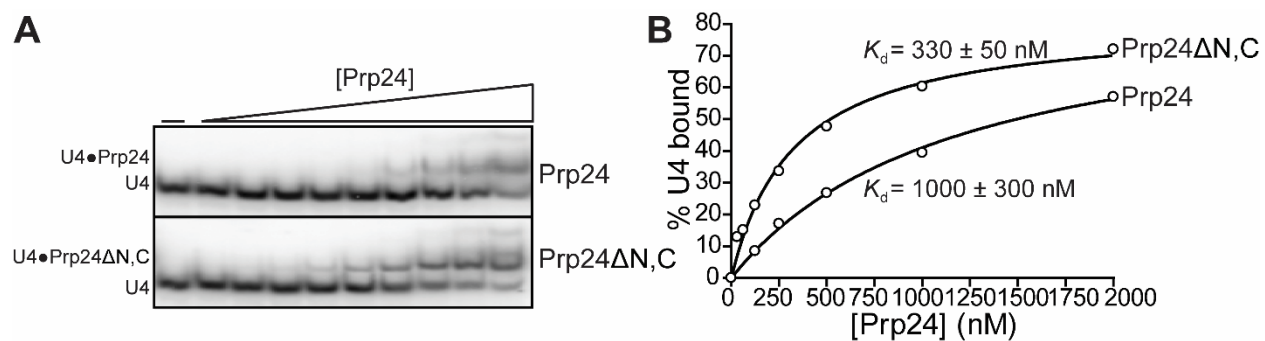

**Supplementary Figure S3.** Truncation of Prp24 protein enhances binding to U4 RNA. A) Native gel analysis of U4-Prp24 binding. Full-length Prp24 (top) and truncated Prp24 (bottom) both bind U4 RNA. B) Truncated Prp24 ( $\Delta$ N,C) binds U4 with a  $K_d$  of 320 nM, while full-length Prp24 binds with a  $K_d$  of 1000 nM.

## Supplementary Figure S4.

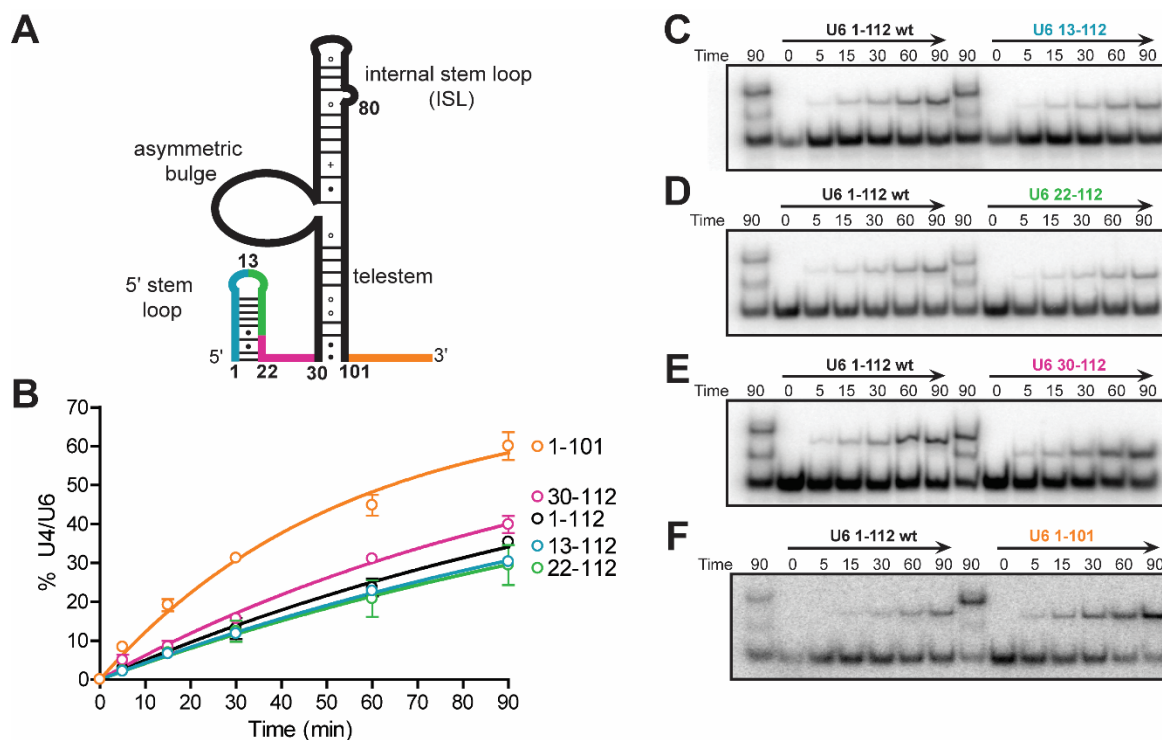

**Supplementary Figure S4.** Truncation of U6 RNA does not impede U4/U6 annealing. A) Secondary structure of U6 showing the regions deleted. B) Quantification of annealing rates for truncations of U6. C- F) Annealing gels comparing wild-type U6 to various truncations of U6. In all gels, a control lane containing the annealing reaction at 90 minutes that has not been proteinase K-treated precedes a time course of annealing reactions treated with proteinase K. C) Truncation of U6 to nucleotides 13-112, disrupting the 5' stem-loop. D) Truncation of U6 to nucleotides 22-112, removing the 5' stem-loop. E) Truncation of U6 to nucleotides 30-112, removing the 5' stem-loop and linker region. F) Truncation of U6 to nucleotides 1-101, removing the 3' single stranded region.

Supplementary Figure S5.

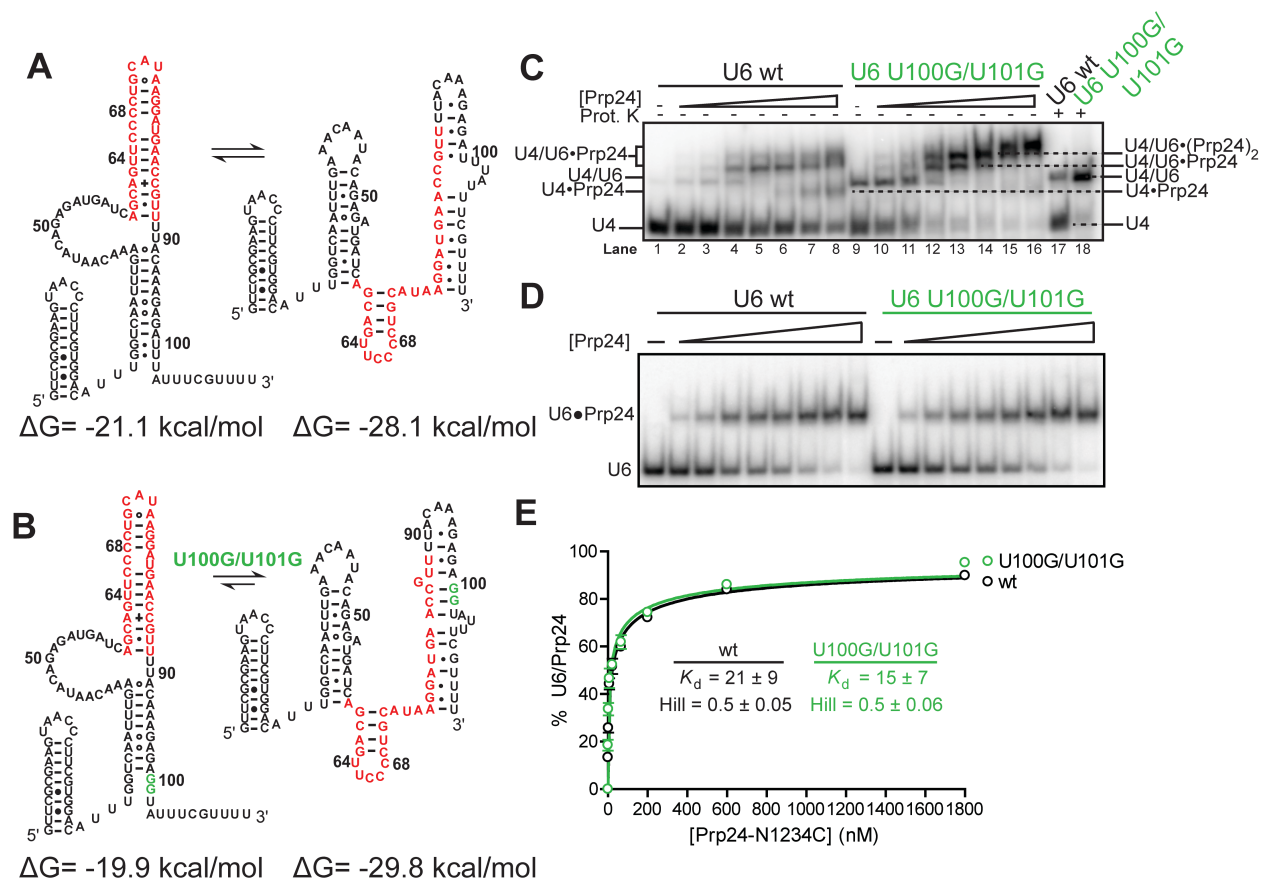

**Supplementary Figure S5.** A) Secondary structure of wild-type RNA (left) is predicted to be in equilibrium with a more stable alternative secondary structure in the absence of Prp24. MFold predicted free energies are indicated below secondary structures. The ISL region is shown in red. B) The U100G/U101G mutations are predicted to further stabilize the putative alternative fold, which may account for the observed protein-free annealing rates. C) Titration of Prp24 reveals multiple binding sites on U4/U6-U100G/U101G (mutant #4). U4 and U6 (wt vs. U100G/U101G) were incubated for 90 minutes with increasing concentrations of Prp24. In lanes 17 and 18, 250 nM Prp24 was incubated with U4 and U6 for 90 minutes and then Proteinase K treated. D) Native gel analysis of U6-Prp24 binding comparing wild type (left) and U6-U100G/U101G (right). E) Prp24-binding curves of wild-type and mutant U6 RNA.

## Supplementary Figure S6.

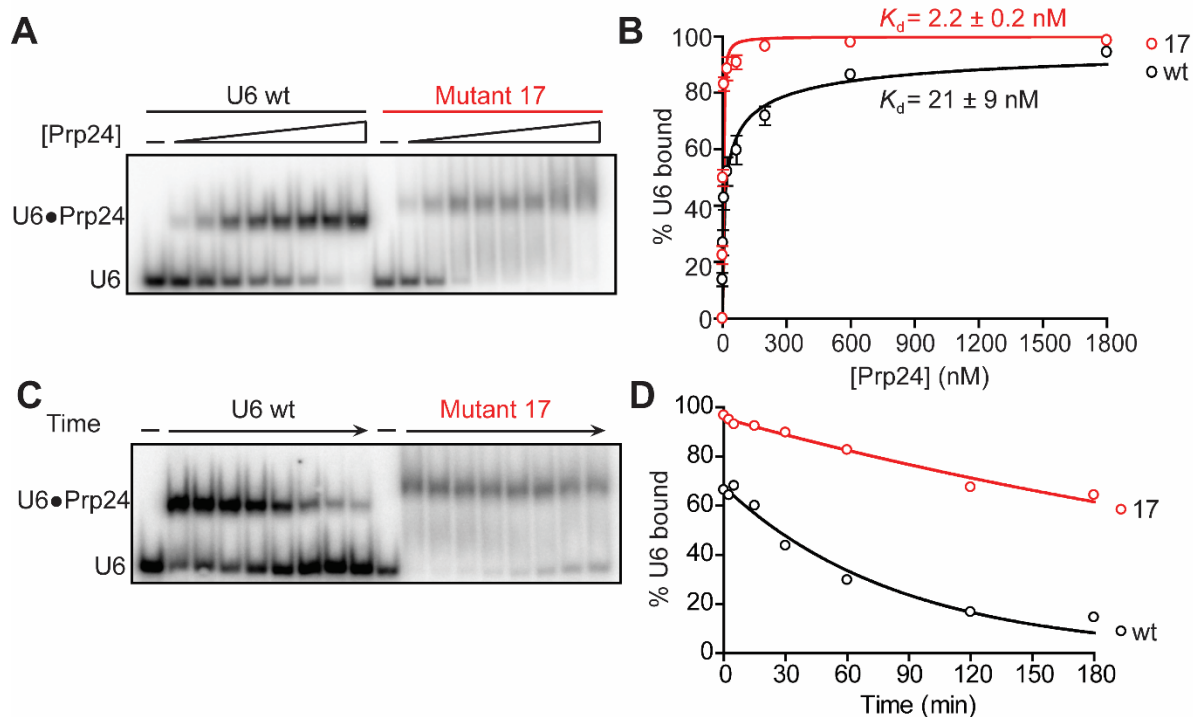

**Supplementary Figure S6.** Hyperstabilization of the telestem strengthens U6-Prp24 binding. A) Native gel analysis of U6-Prp24 binding for wild-type (left) and mutant 17 (right) RNAs. B) Binding curves of wild-type and mutant RNA. C) Native gel analysis of off-rates for wild-type and mutant RNA. Radiolabeled U6-Prp24 was formed with 50 nM Prp24, then challenged with 200 nM unlabeled U6 (a > 200-fold excess) for increasing lengths of time. D) Quantification of off-rate gel. Data was fit with a one phase exponential decay equation.

**Supplementary Figure S7.**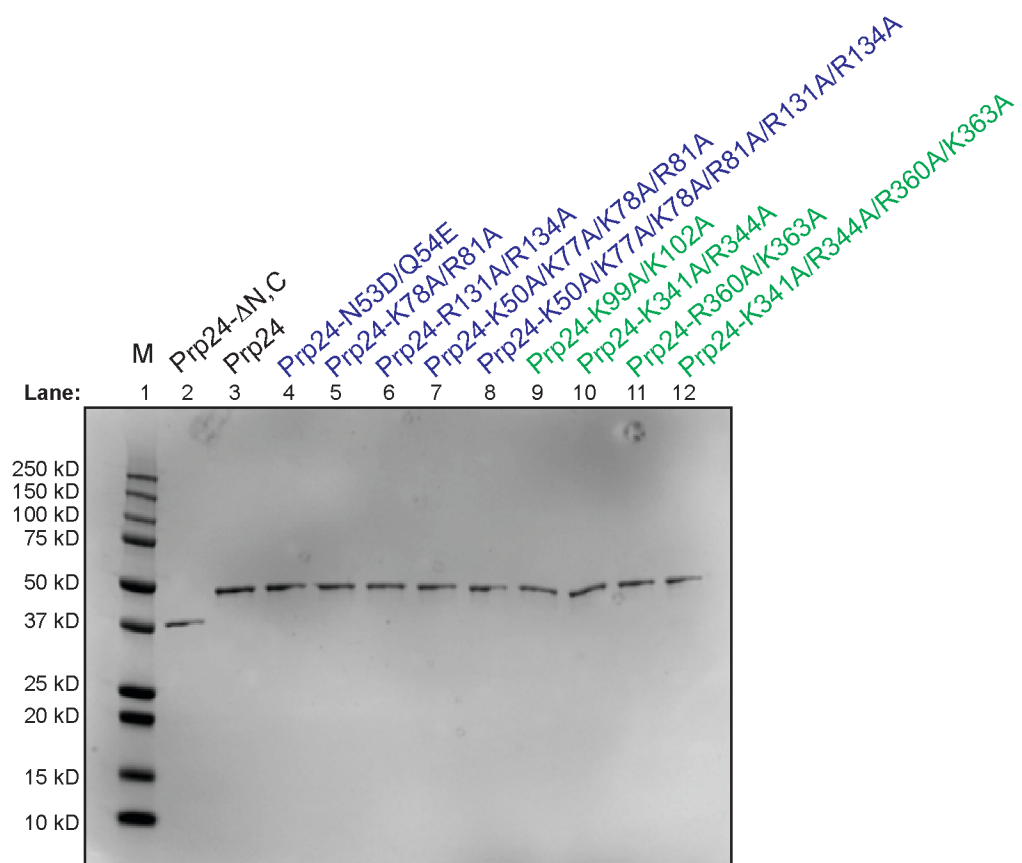**Supplementary Figure S7.** SDS-PAGE gel of purified recombinant Prp24 constructs.
